# Supplementary material for: Extracellular vesicles induce protective immunity against Trichuris muris
Source: PubMed Central journal article supplement (PMC6055854; doi:10.1111/pim.12536), 2018-05-23

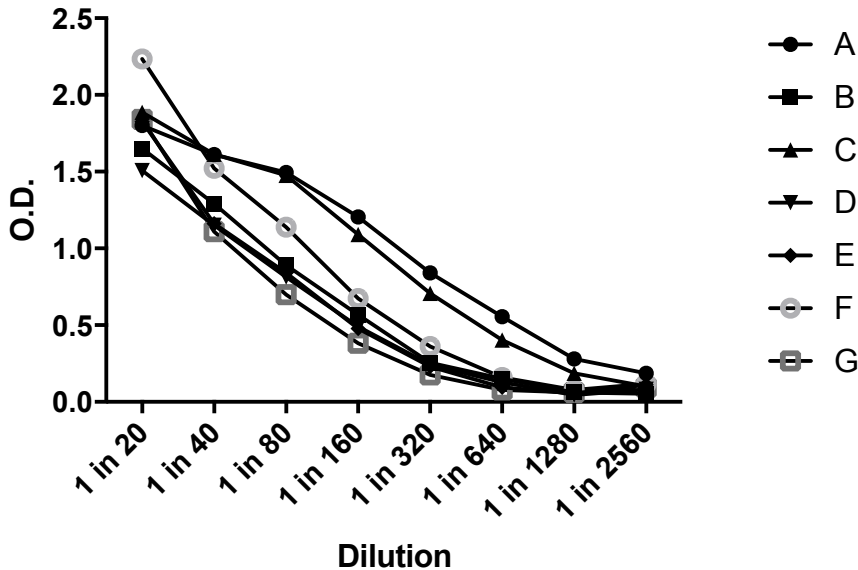

Supplement: PIM-40-na-s001.pdf [file PIM-40-na-s001.pdf]
