# Supplementary material for: Extracellular vesicles induce protective immunity against Trichuris muris
Source: PubMed Central journal article supplement (PMC6055854; doi:10.1111/pim.12536), 2018-05-23
Supplement: PIM-40-na-s002.pdf [file PIM-40-na-s002.pdf]

| Accession number     | Protein                                                           | Mw (kDa) | Sample 1 | Sample 2 | Sample 3 | Identified in T. muris ES (Y/N) | Signal peptide (Y/N) |
|----------------------|-------------------------------------------------------------------|----------|----------|----------|----------|---------------------------------|----------------------|
| 1 TMJE_s0245000500   | VWD and Vitellogenin N and DUF1943-domain containing protein      | 202      | 15       | 52       | 41       | Y                               | Y                    |
| 2 TMJE_s0134000500   | CAP domain containing protein                                     | 32       | 8        | 10       | 7        | Y                               | Y                    |
| 3 TMJE_s0049005700   | Protein crumbs                                                    | 382      | 9        | 17       | 11       | Y                               | N                    |
| 4 TMJE_s0004007100   | Trypsin domain containing protein                                 | 107      | 7        | 15       | 8        | Y                               | Y                    |
| 5 TMJE_s0052001100   | Hypothetical protein                                              | 38       | 6        | 8        | 7        | Y                               | Y                    |
| 6 TMJE_s0093001800   | Vacuolar protein sorting associated protein 52                    | 175      | 7        | 10       | 9        | Y                               | N                    |
| 7 TMJE_s0175000100   | Flam-B 9093 domain containing protein                             | 34       | 8        | 10       | 8        | Y                               | N                    |
| 8 TMJE_s0003000700   | Histone H4                                                        | 11       | 2        | 3        | 6        | Y                               | N                    |
| 9 TMJE_s0029005700   | Actin                                                             | 42       | 8        | 7        | 8        | Y                               | N                    |
| 10 TMJE_s0029007100  | Beta tubulin                                                      | 50       | 6        | 8        | 11       | N                               | N                    |
| 11 TMJE_s0140001200  | ABC transporter, ATP binding protein                              | 327      | 4        | 7        | 5        | N                               | N                    |
| 12 TMJE_s0071005500  | Angiotensin converting enzyme                                     | 153      | 5        | 7        | 11       | Y                               | N                    |
| 13 TMJE_s0208001100  | CUB and Ldl recept a and Trypsin domain containing protein        | 94       | 7        | 9        | 7        | N                               | N                    |
| 14 TMJE_s0201000900  | Flam-B 9093 domain containing protein                             | 39       | 3        | 7        | 10       | Y                               | Y                    |
| 15 TMJE_s0028000200  | Phosphoenolpyruvate carboxykinase GTP                             | 80       | 6        | 7        | 3        | Y                               | N                    |
| 16 TMJE_s0033001500  | CAP domain containing protein                                     | 40       | 4        | 7        | 8        | Y                               | Y                    |
| 17 TMJE_s0175000200  | Flam-B 9093 domain containing protein                             | 37       | 4        | 5        | 8        | Y                               | Y                    |
| 18 TMJE_s0091002200  | Fasciclin domain containing protein                               | 81       | 7        | 9        | 6        | Y                               | Y                    |
| 19 TMJE_s0177000800  | Heat shock protein 70                                             | 71       | 4        | 9        | 5        | Y                               | N                    |
| 20 TMJE_s0005010900  | Neurogenic locus notch protein                                    | 367      | 6        | 2        | 5        | Y                               | Y                    |
| 21 TMJE_s0026005200  | Hypothetical protein                                              | 11       | 3        | 4        | 2        | N                               | N                    |
| 22 TMJE_s0003006100  | Hypothetical protein                                              | 225      | 2        | 6        | 10       | Y                               | Y                    |
| 23 TMJE_s0033006300  | Hypothetical protein                                              | 40       | 5        | 5        | 6        | Y                               | Y                    |
| 24 TMJE_s0094001000  | Glyceraldehyde 3 phosphate dehydrogenase                          | 41       | 7        | 7        | 5        | Y                               | N                    |
| 25 TMJE_s0004006800  | Trypsin domain containing protein                                 | 129      | 2        | 7        | 3        | Y                               | N                    |
| 26 TMJE_s0022002100  | Clathrin heavy chain                                              | 193      | 0        | 5        | 8        | N                               | Y                    |
| 27 TMJE_s0048006500  | Notch 2                                                           | 40       | 3        | 4        | 5        | N                               | Y                    |
| 28 TMJE_s0042005600  | Motile sperm domain containing protein                            | 24       | 3        | 4        | 6        | Y                               | N                    |
| 29 TMJE_s0173000900  | Delta protein 4                                                   | 54       | 4        | 8        | 5        | Y                               | N                    |
| 30 TMJE_s0002015700  | Vitellogenin N and VWD and C8 and DUF1943 domain containing       | 354      | 0        | 6        | 2        | Y                               | Y                    |
| 31 TMJE_s0001012400  | Phosphoprotein phosphatase 1                                      | 86       | 4        | 8        | 5        | Y                               | N                    |
| 32 TMJE_s0085004800  | Histone H3                                                        | 17       | 0        | 2        | 3        | N                               | N                    |
| 33 TMJE_s0003006600  | Flam B 13663 domain containing protein                            | 164      | 0        | 6        | 5        | Y                               | Y                    |
| 34 TMJE_s0147001700  | Hypothetical protein                                              | 15       | 5        | 4        | 4        | Y                               | Y                    |
| 35 TMJE_s0302000300  | Fructose biphosphate aldolase class I                             | 44       | 5        | 8        | 2        | Y                               | N                    |
| 36 TMJE_s0022011000  | Hypothetical protein                                              | 21       | 2        | 3        | 2        | Y                               | N                    |
| 37 TMJE_s0119001000  | Membrane metallo endopeptidase 1 like protein                     | 173      | 9        | 4        | 0        | Y                               | Y                    |
| 38 TMJE_s0001012300  | Hypothetical protein                                              | 39       | 4        | 6        | 5        | Y                               | N                    |
| 39 TMJE_s00228001300 | Na <sup>+</sup> -K <sup>+</sup> ATPase alpha subunit protein      | 114      | 2        | 4        | 2        | N                               | N                    |
| 40 TMJE_s0082001700  | Ubiquitin domain containing protein                               | 95       | 2        | 0        | 3        | N                               | N                    |
| 41 TMJE_s0052006000  | Hypothetical protein                                              | 54       | 2        | 6        | 2        | N                               | Y                    |
| 42 TMJE_s0023009900  | Peptidase family M13 containing protein                           | 119      | 0        | 3        | 4        | N                               | Y                    |
| 43 TMJE_s0008012300  | Conserved hypothetical protein                                    | 42       | 3        | 4        | 2        | N                               | Y                    |
| 44 TMJE_s0049001500  | Trypsin domain containing protein                                 | 139      | 0        | 4        | 7        | Y                               | N                    |
| 45 TMJE_s0037005100  | Tetraspanin 9                                                     | 43       | 0        | 5        | 4        | Y                               | N                    |
| 46 TMJE_s0053002900  | Conserved hypothetical protein                                    | 107      | 2        | 8        | 0        | N                               | N                    |
| 47 TMJE_s0117003000  | Eukaryotic translation elongation factor 1A                       | 49       | 3        | 7        | 4        | Y                               | N                    |
| 48 TMJE_s0014013200  | Heat shock protein 90                                             | 81       | 2        | 6        | 2        | Y                               | N                    |
| 49 TMJE_s0060006700  | Protein eyes shut                                                 | 81       | 2        | 6        | 2        | N                               | N                    |
| 50 TMJE_s0027006600  | ASP domain containing protein                                     | 44       | 2        | 5        | 3        | Y                               | N                    |
| 51 TMJE_s0102000900  | Enolase                                                           | 48       | 3        | 5        | 2        | Y                               | N                    |
| 52 TMJE_s0106000600  | Moesin,ezrin,radixin 1                                            | 69       | 3        | 8        | 0        | Y                               | N                    |
| 53 TMJE_s0019006300  | Hypothetical protein                                              | 39       | 3        | 5        | 4        | Y                               | Y                    |
| 54 TMJE_s0008014600  | Hypothetical protein                                              | 34       | 4        | 5        | 2        | Y                               | N                    |
| 55 TMJE_s0311000100  | Neurogenic locus notch protein 1                                  | 52       | 2        | 3        | 3        | N                               | N                    |
| 56 TMJE_s0157001800  | Trans 2 enoyl coenzyme A reductase                                | 32       | 2        | 2        | 4        | Y                               | N                    |
| 57 TMJE_s0037004100  | Conserved hypothetical protein                                    | 54       | 2        | 6        | 4        | Y                               | Y                    |
| 58 TMJE_s0053003800  | Trypsin domain containing protein                                 | 33       | 4        | 4        | 0        | Y                               | Y                    |
| 59 TMJE_s0022000400  | Na <sup>+</sup> -K <sup>+</sup> ATPase alpha subunit 1            | 118      | 3        | 6        | 3        | Y                               | N                    |
| 60 TMJE_s0037003800  | NADP dependent malic enzyme, mitochondrial                        | 71       | 0        | 10       | 2        | Y                               | N                    |
| 61 TMJE_s0327000100  | Flam-B 9093 domain containing protein                             | 39       | 0        | 4        | 6        | Y                               | Y                    |
| 62 TMJE_s0042008400  | Peptidase M2 domain containing protein                            | 40       | 2        | 5        | 4        | Y                               | Y                    |
| 63 TMJE_s0070003500  | TSP-1 domain containing protein                                   | 46       | 3        | 5        | 3        | Y                               | Y                    |
| 64 TMJE_s0024002900  | Hypothetical protein                                              | 32       | 3        | 3        | 2        | Y                               | Y                    |
| 65 TMJE_s0203001300  | Small heat shock protein                                          | 16       | 0        | 2        | 6        | N                               | N                    |
| 66 TMJE_s0049001700  | Trypsin domain containing protein                                 | 215      | 0        | 3        | 4        | N                               | Y                    |
| 67 TMJE_s0120000600  | Tubulin alpha chain                                               | 50       | 0        | 5        | 5        | Y                               | N                    |
| 68 TMJE_s0028001200  | VAB 10a protein                                                   | 829      | 3        | 0        | 3        | Y                               | Y                    |
| 69 TMJE_s0060000200  | Prominin domain containing protein                                | 76       | 2        | 3        | 3        | Y                               | Y                    |
| 70 TMJE_s001000830   | Onchocystatin                                                     | 17       | 4        | 3        | 3        | N                               | N                    |
| 71 TMJE_s0036001600  | Conserved hypothetical protein                                    | 35       | 2        | 4        | 3        | N                               | N                    |
| 72 TMJE_s0117002800  | Trypsin and CUB domain containing protein                         | 71       | 2        | 4        | 3        | Y                               | N                    |
| 73 TMJE_s0201000800  | Conserved hypothetical protein                                    | 51       | 0        | 3        | 2        | Y                               | N                    |
| 74 TMJE_s0191000800  | Trypsin domain containing protein                                 | 79       | 0        | 5        | 2        | Y                               | Y                    |
| 75 TMJE_s0005001100  | Kunitz protease inhibitor                                         | 25       | 2        | 4        | 3        | Y                               | Y                    |
| 76 TMJE_s0006000700  | Solute carrier family 2, facilitated glucose                      | 62       | 0        | 4        | 2        | Y                               | N                    |
| 77 TMJE_s0281000600  | CBM 14 and TIL domain containing protein                          | 202      | 2        | 6        | 0        | Y                               | N                    |
| 78 TMJE_s0116002200  | Ubiquitin associated and SH3                                      | 41       | 0        | 6        | 2        | Y                               | N                    |
| 79 TMJE_s0049001700  | Hypothetical protein                                              | 27       | 3        | 2        | 4        | Y                               | N                    |
| 80 TMJE_s0037003400  | Pathogenesis protein 1B                                           | 41       | 3        | 2        | 4        | Y                               | N                    |
| 81 TMJE_s0189001400  | Neurogenic locus notch protein                                    | 54       | 2        | 2        | 0        | Y                               | Y                    |
| 82 TMJE_s0012010600  | EGF domain containing protein                                     | 78       | 2        | 5        | 2        | Y                               | Y                    |
| 83 TMJE_s0014006600  | Motile sperm domain containing protein                            | 15       | 3        | 4        | 0        | Y                               | Y                    |
| 84 TMJE_s0086000700  | 78 kDa glucose regulated protein                                  | 73       | 2        | 3        | 0        | Y                               | Y                    |
| 85 TMJE_s0009007500  | 14-3-3 protein                                                    | 28       | 5        | 5        | 0        | Y                               | N                    |
| 86 TMJE_s0015008200  | Protein jagged 2                                                  | 19       | 2        | 4        | 2        | N                               | N                    |
| 87 TMJE_s0031000300  | ADP-ATP carrier protein, heartskeletal muscle                     | 48       | 3        | 2        | 2        | N                               | N                    |
| 88 TMJE_s0013012700  | Motile sperm domain containing protein                            | 14       | 3        | 3        | 0        | Y                               | N                    |
| 89 TMJE_s0033006400  | CAP domain containing protein                                     | 35       | 2        | 4        | 3        | Y                               | Y                    |
| 90 TMJE_s0096005200  | Ubiquitin associated and SH3 protein                              | 39       | 0        | 4        | 2        | Y                               | N                    |
| 91 TMJE_s0070007000  | Proprotein convertase subtilisin:kexin type 4                     | 72       | 3        | 2        | 0        | N                               | Y                    |
| 92 TMJE_s0008012200  | Conserved hypothetical protein                                    | 34       | 3        | 4        | 0        | N                               | Y                    |
| 93 TMJE_s0007005500  | Peroxisredoxin 2                                                  | 121      | 3        | 0        | 2        | Y                               | N                    |
| 94 TMJE_s0014004800  | Lamp domain containing protein                                    | 46       | 2        | 2        | 0        | N                               | Y                    |
| 95 TMJE_s0001022900  | Conserved hypothetical protein                                    | 40       | 2        | 4        | 0        | Y                               | N                    |
| 96 TMJE_s0089001100  | Conserved hypothetical protein                                    | 54       | 0        | 4        | 5        | Y                               | Y                    |
| 97 TMJE_s0003006000  | Hypothetical protein                                              | 52       | 0        | 3        | 5        | N                               | N                    |
| 98 TMJE_s0033002400  | Dipeptidyl peptidase 1                                            | 50       | 2        | 3        | 3        | N                               | Y                    |
| 99 TMJE_s0006008700  | Thioredoxin                                                       | 22       | 0        | 2        | 2        | Y                               | Y                    |
| 100 TMJE_s0022008100 | BTB domain containing protein                                     | 41       | 0        | 5        | 2        | Y                               | N                    |
| 101 TMJE_s0054001500 | E3 binding and 2 oxoacid dh and Biotin lipoyl domain containing p | 53       | 0        | 2        | 4        | N                               | N                    |
| 102 TMJE_s0038006700 | 32 kDa beta galactoside binding lectin                            | 39       | 0        | 2        | 2        | Y                               | N                    |
| 103 TMJE_s0058002600 | Hypothetical protein                                              | 25       | 2        | 3        | 0        | Y                               | N                    |
| 104 TMJE_s0033009500 | Conserved hypothetical protein                                    | 36       | 0        | 2        | 3        | Y                               | N                    |
| 105 TMJE_s0005011400 | Peptidyl prolyl cis trans isomerase 7                             | 23       | 2        | 2        | 0        | Y                               | N                    |
| 106 TMJE_s0023004600 | Flam-B 9093 domain containing protein                             | 27       | 0        | 3        | 3        | Y                               | N                    |
| 107 TMJE_s0131003100 | Prominin domain containing protein                                | 87       | 0        | 2        | 2        | N                               | N                    |
| 108 TMJE_s0081001900 | Protein disulfide isomerase                                       | 55       | 0        | 2        | 2        | Y                               | Y                    |
| 109 TMJE_s0015006100 | Peptidase M8 domain containing protein                            | 50       | 2        | 5        | 0        | Y                               | N                    |
| 110 TMJE_s0114001900 | Hypothetical protein                                              | 21       | 2        | 3        | 2        | N                               | N                    |
| 111 TMJE_s0163002000 | Ras protein Rab 11B                                               | 31       | 0        | 2        | 2        | N                               | N                    |
| 112 TMJE_s0058002100 | Conserved hypothetical protein                                    | 26       | 2        | 2        | 0        | Y                               | N                    |
| 113 TMJE_s0122001100 | Pol poly protein                                                  | 43       | 2        | 2        | 0        | Y                               | N                    |
| 114 TMJE_s0002004000 | Flam-B 18698 and PLAT and DCX domain containing protein           | 118      | 0        | 2        | 2        | Y                               | N                    |
| 115 TMJE_s0291000100 | Prominin domain containing protein                                | 36       | 0        | 2        | 4        | Y                               | N                    |
| 116 TMJE_s0012010900 | Neurogenic locus notch protein                                    | 43       | 2        | 3        | 0        | Y                               | Y                    |
| 117 TMJE_s0131003400 | Hypothetical protein                                              | 23       | 2        | 2        | 0        | Y                               | N                    |
| 118 TMJE_s0005004200 | Maltate dehydrogenase                                             | 39       | 0        | 2        | 2        | Y                               | N                    |
| 119 TMJE_s0036001700 | Conserved hypothetical protein                                    | 37       | 0        | 2        | 2        | Y                               | N                    |
| 120 TMJE_s0104001300 | Hypothetical protein                                              | 10       | 3        | 2        | 0        | Y                               | N                    |
| 121 TMJE_s0119002100 | Galectin                                                          | 31       | 2        | 2        | 0        | Y                               | N                    |
| 122 TMJE_s0004012300 | LIM domain containing protein                                     | 24       | 0        | 2        | 3        | Y                               | Y                    |
| 123 TMJE_s0041006400 | Hypothetical protein                                              | 33       | 0        | 2        | 3        | Y                               | Y                    |
| 124 TMJE_s0034006900 | T complex protein 1 subunit beta                                  | 58       | 0        | 2        | 2        | Y                               | N                    |
| 125 TMJE_s0172001800 | CH domain containing protein                                      | 41       | 0        | 2        | 2        | Y                               | N                    |
