# Supplementary material for: Extracellular vesicles induce protective immunity against Trichuris muris
Source: PubMed Central journal article supplement (PMC6055854; doi:10.1111/pim.12536), 2018-05-23
Supplement: PIM-40-na-s003.pdf [file PIM-40-na-s003.pdf]

| <b>Protein</b>                                     | <b>Organism</b>          | <b>Query coverage (%)</b> | <b>Identity (%)</b> |
|----------------------------------------------------|--------------------------|---------------------------|---------------------|
| Vacuolar sorting associated protein 52             | <i>T. trichiura</i>      | 26                        | 80                  |
| Vacuolar sorting associated protein 52-like protei | <i>T. pseudospiralis</i> | 26                        | 58                  |
| Vacuolar sorting associated protein 52-like protei | <i>T. patagoniensis</i>  | 26                        | 59                  |
| Vacuolar sorting associated protein 52-like protei | <i>T. papuae</i>         | 26                        | 59                  |
| Vacuolar sorting associated protein 52-like protei | <i>T. zimbabwensis</i>   | 26                        | 59                  |
| Vacuolar sorting associated protein 52-like protei | <i>T. nelsoni</i>        | 26                        | 58                  |
